# Supplementary figures and images for: Mechanism of Astragalus membranaceus Alleviating Acquired Hyperlipidemia Induced by High-Fat Diet through Regulating Lipid Metabolism
Source: MDPI journal article supplement (doi:10.3390/nu14050954), 2022-02-23

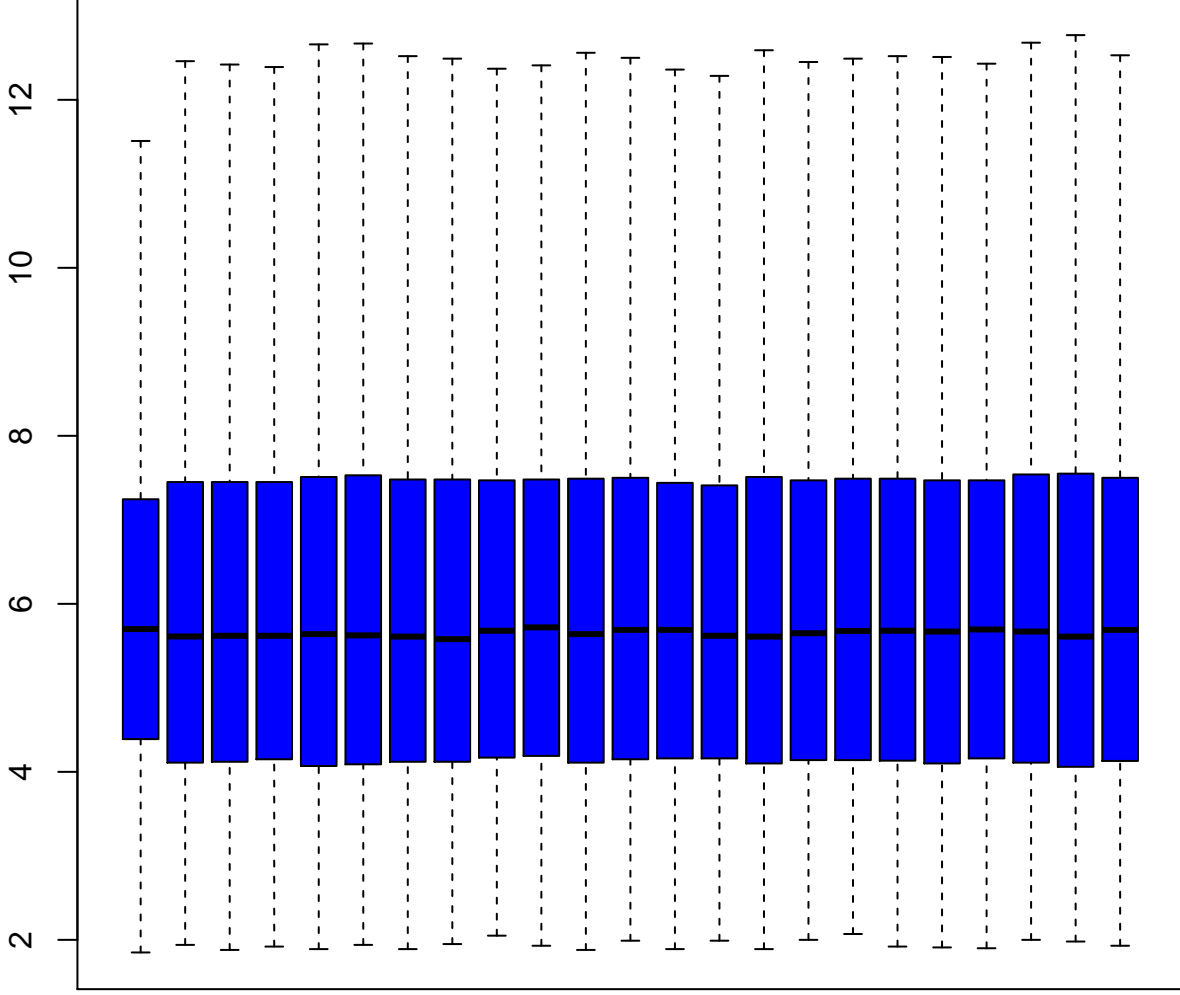

Supplement: s1 [file s1]

# Volcano

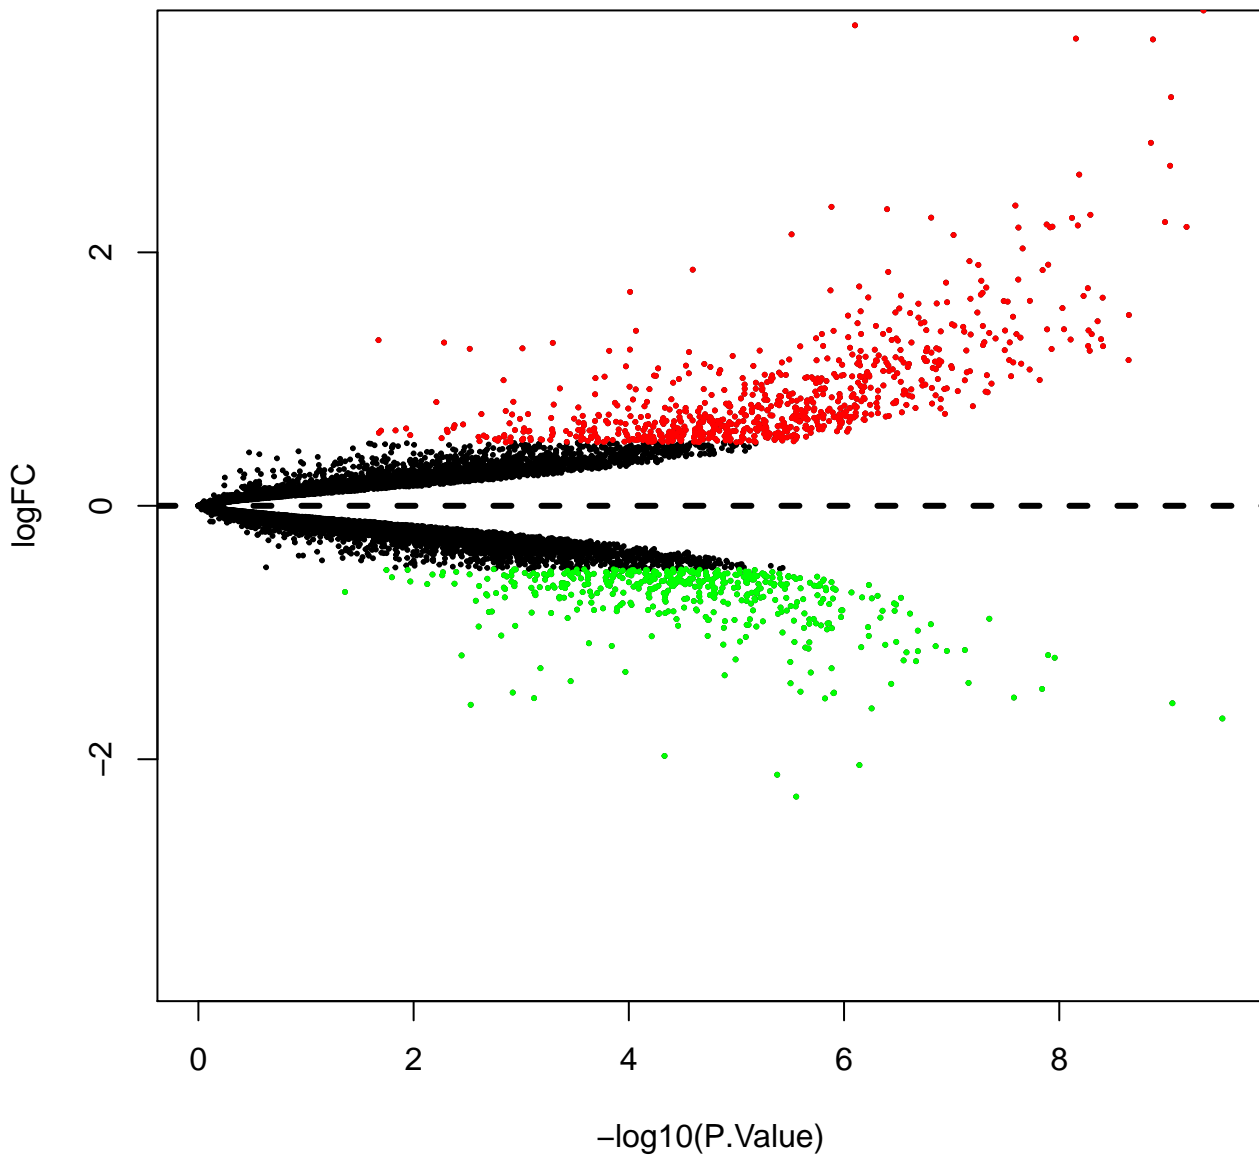

Supplement: s1 [file s1]

# Volcano

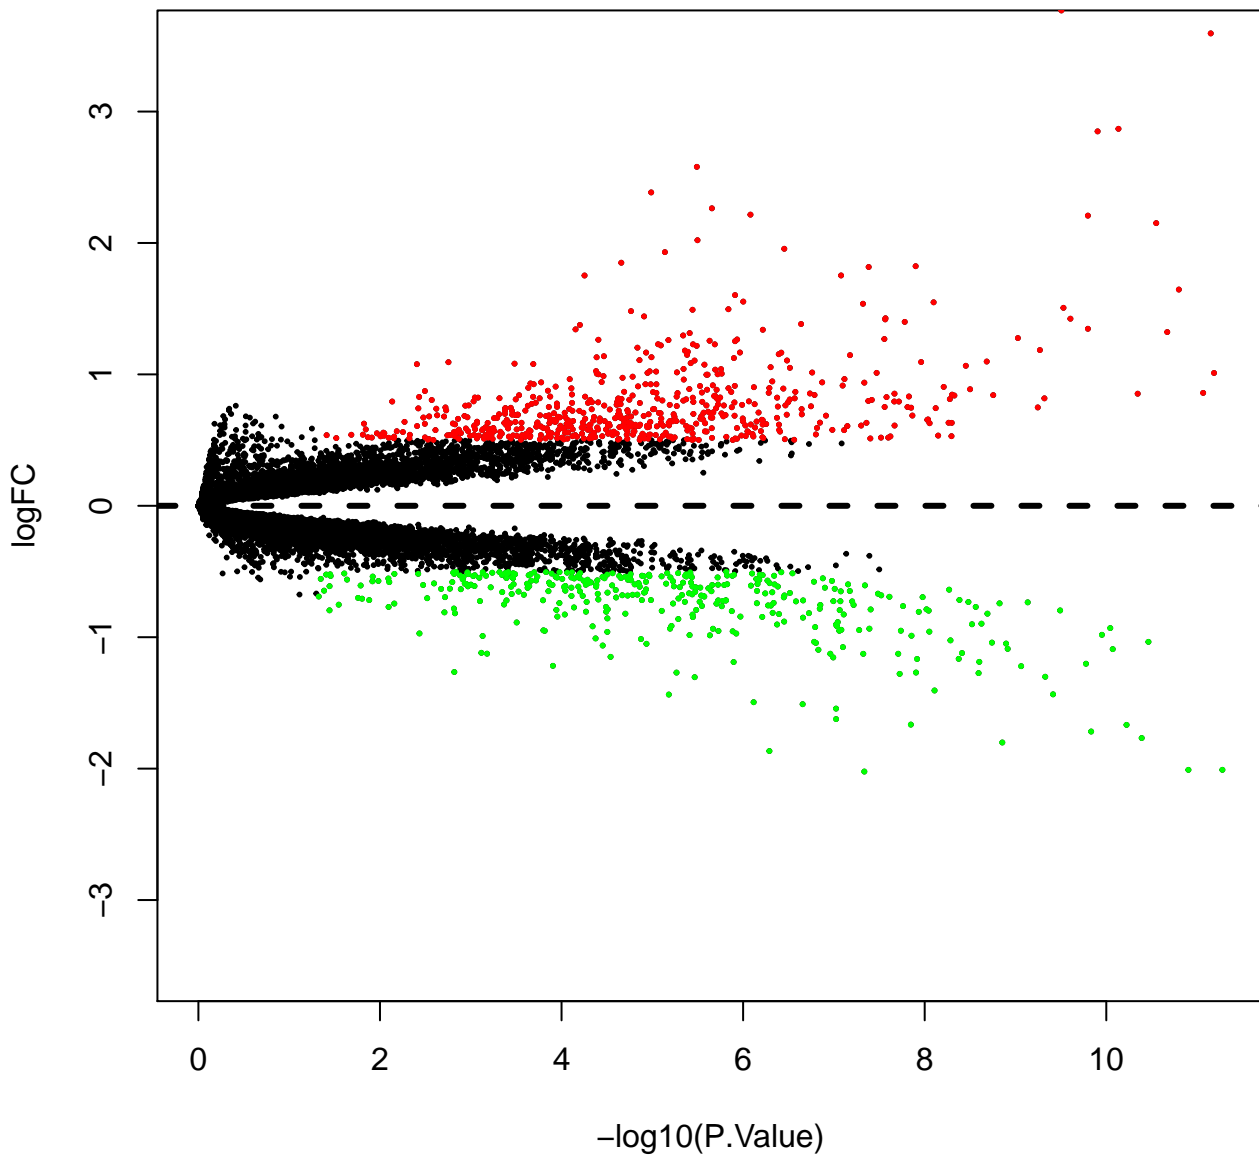

Supplement: s1 [file s1]

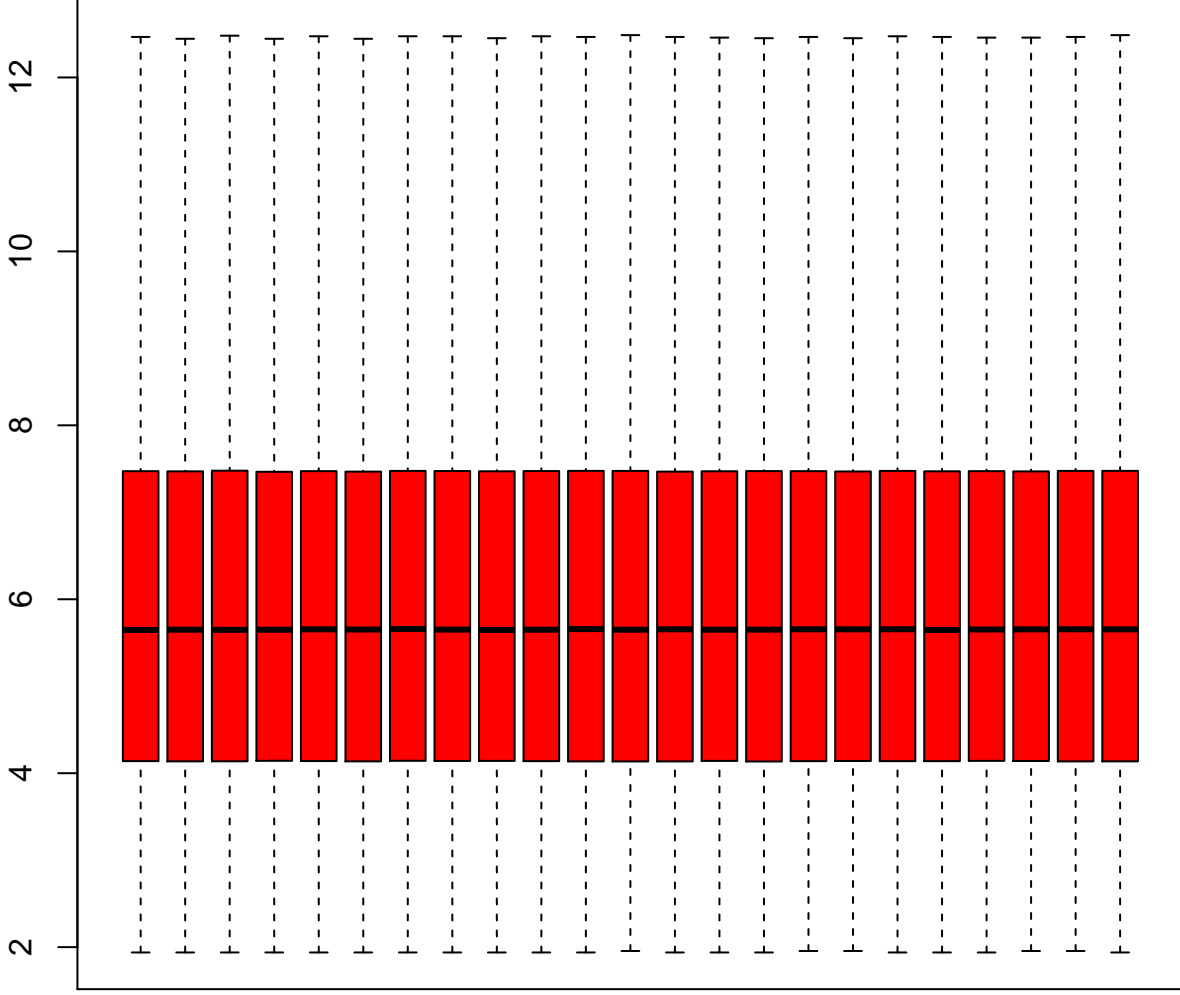

Supplement: s1 [file s1]

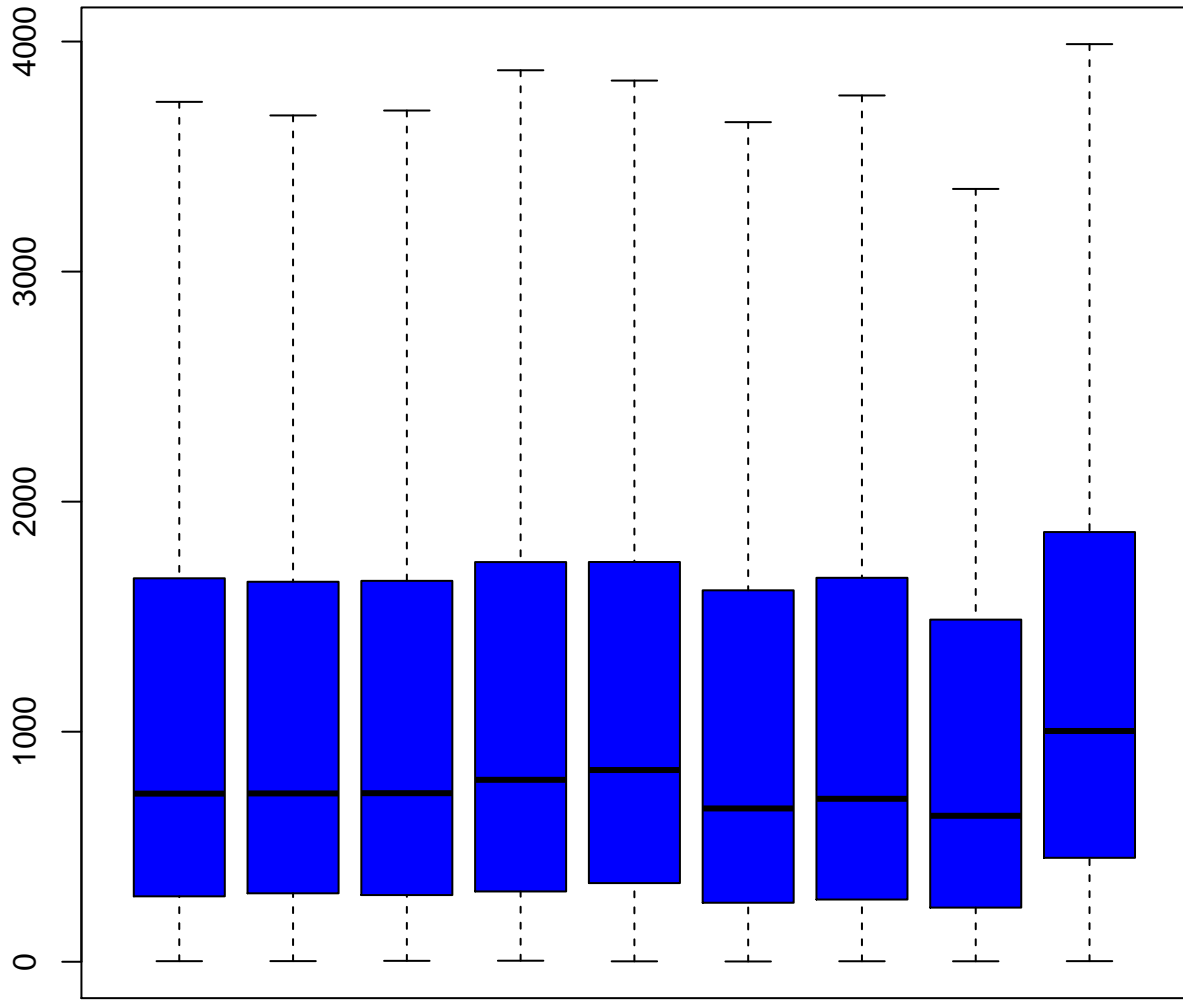

Supplement: s1 [file s1]

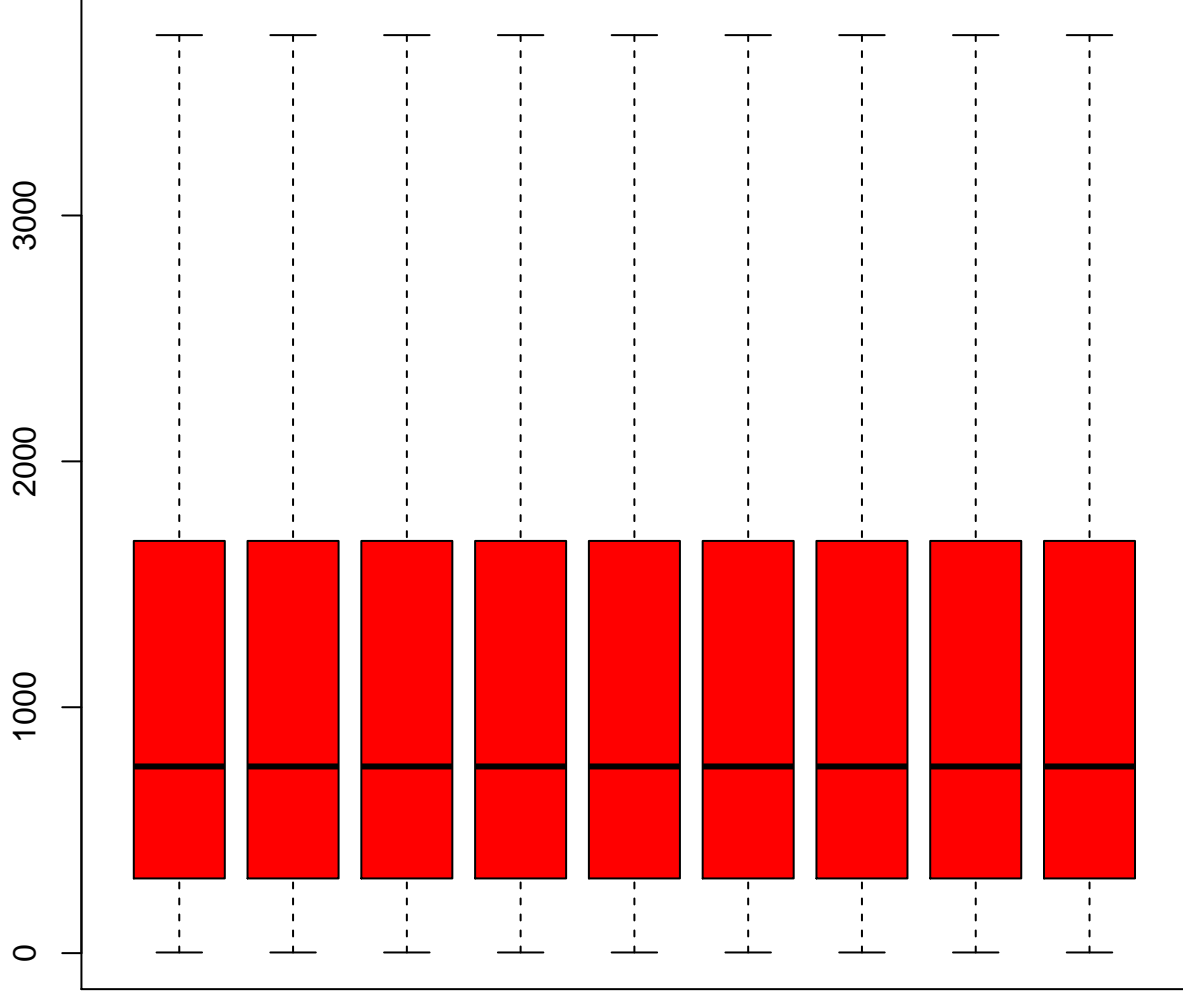

Supplement: s1 [file s1]

# Volcano

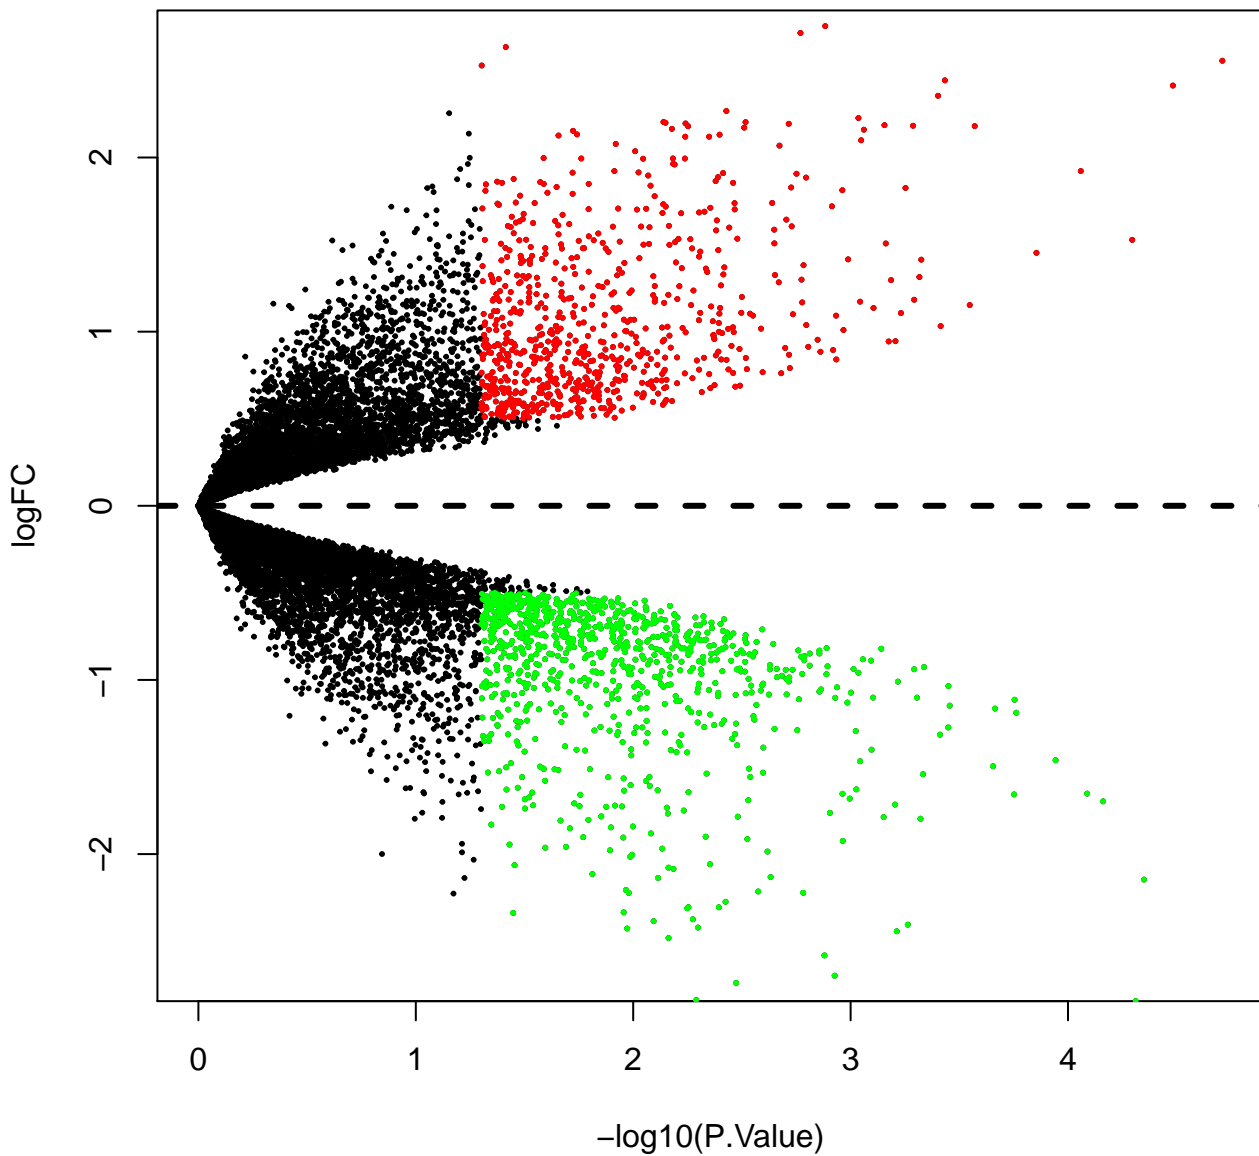

Supplement: s1 [file s1]

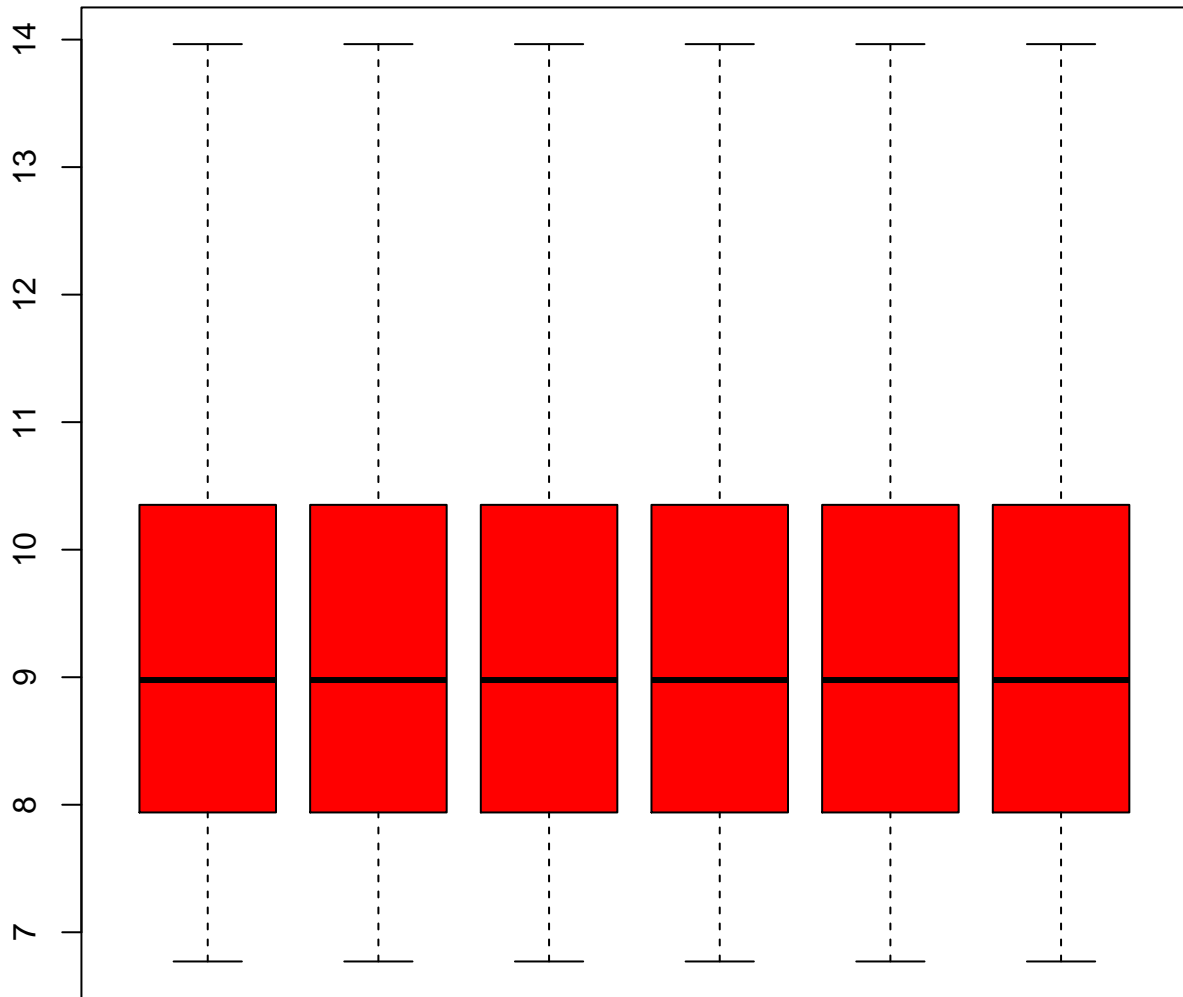

Supplement: s1 [file s1]

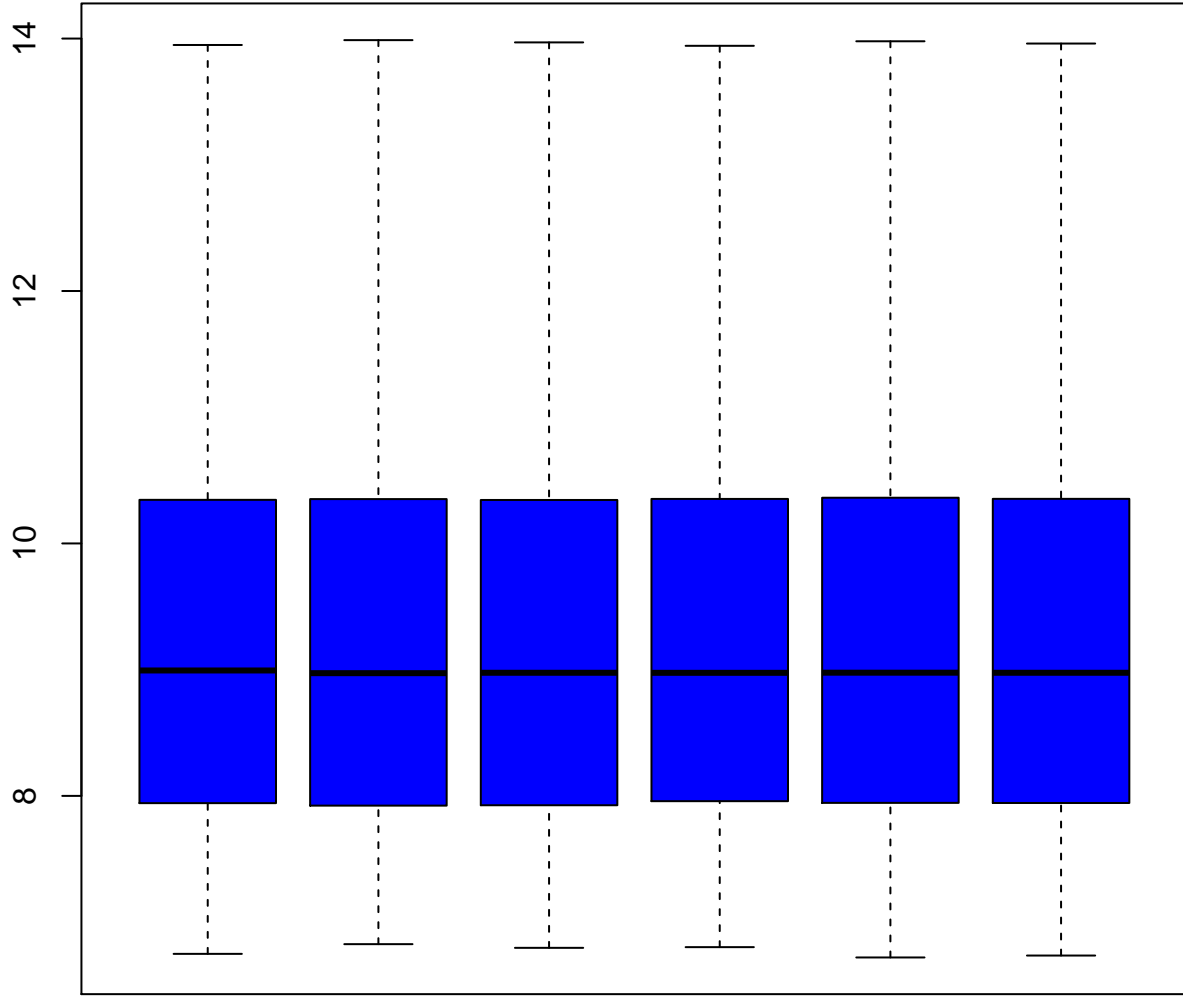

Supplement: s1 [file s1]
